# Supplementary material
Source: PubMed Central journal article supplement (PMC3543646)
Supplement: 04eabf016fce6bad2dcdf30b3955292f_tablesS1-S5.pdf [file 04eabf016fce6bad2dcdf30b3955292f_tablesS1-S5.pdf]

|                                                     | Ctrl<br>(DMSO)                    | Cap<br>1 $\mu$ M                   | Cap<br>2.5 $\mu$ M                 | Cap<br>5 $\mu$ M                   | Cap<br>10 $\mu$ M                  | Cap<br>15 $\mu$ M                 | Cap<br>20 $\mu$ M                  | Cap<br>25 $\mu$ M                  | Cap<br>30 $\mu$ M                | Cap<br>40 $\mu$ M           | Cap<br>50 $\mu$ M                  | Cap<br>100<br>$\mu$ M              | Cap<br>300<br>$\mu$ M              |
|-----------------------------------------------------|-----------------------------------|------------------------------------|------------------------------------|------------------------------------|------------------------------------|-----------------------------------|------------------------------------|------------------------------------|----------------------------------|-----------------------------|------------------------------------|------------------------------------|------------------------------------|
| TER <sub>ini</sub><br>( $\Omega$ .cm <sup>2</sup> ) | 1512.4<br>±<br>114.6<br>n = 40    | 1696.8<br>±<br>222.6<br>n = 16     | 2125.2<br>±<br>168<br>n = 12       | 1313.4<br>±<br>139.1<br>n = 12     | 1140.5<br>±<br>109.2<br>n = 16     | 2754.7<br>±<br>220.9<br>n = 8     | 1556.6<br>±<br>125.7<br>n = 13     | 2235.9<br>±<br>164.9<br>n = 12     | 916.6<br>±<br>36.0<br>n = 11     | 957.4<br>±<br>46.2<br>n = 7 | 1091.6<br>±<br>78.2<br>n = 11      | 2194.2<br>±<br>272.9<br>n = 8      | 1892.8<br>±<br>146.7<br>n = 8      |
| Isc <sub>ini</sub><br>( $\mu$ A/cm <sup>2</sup> )   | 0.99<br>±<br>0.11                 | 0.90<br>±<br>0.15                  | 0.63<br>±<br>0.77                  | 1.05<br>±<br>0.17                  | 1.03<br>±<br>0.20                  | 0.59<br>±<br>0.64                 | 0.81<br>±<br>0.05                  | 0.61<br>±<br>0.05                  | 0.64<br>±<br>0.02                | 0.59<br>±<br>0.03           | 0.62<br>±<br>0.04                  | 0.55<br>±<br>0.04                  | 0.64<br>±<br>0.02                  |
| TER <sub>30</sub><br>( $\Omega$ .cm <sup>2</sup> )  | 1523.7<br>±<br>90.3 <sup>NS</sup> | 1650.1<br>±<br>166.2 <sup>NS</sup> | 2117.5<br>±<br>128.5 <sup>NS</sup> | 1419.3<br>±<br>156.9 <sub>NS</sub> | 1173.7<br>±<br>123.2 <sup>NS</sup> | 2502.8<br>±<br>90.5 <sup>NS</sup> | 1597.4<br>±<br>139.5 <sup>NS</sup> | 2153.6<br>±<br>108.5 <sup>NS</sup> | 873.0<br>±<br>34.6 <sup>NS</sup> | 860.3<br>±<br>55.6*         | 1085.4<br>±<br>102.3 <sup>NS</sup> | 1926.1<br>±<br>189.3 <sup>NS</sup> | 1559.8<br>±<br>167.9 <sup>NS</sup> |
| Isc <sub>30</sub><br>( $\mu$ A/cm <sup>2</sup> )    | 1.20<br>±<br>0.12 <sup>***</sup>  | 1.11<br>±<br>0.20*                 | 0.72<br>±<br>0.06*                 | 1.29<br>±<br>0.24*                 | 1.35<br>±<br>0.29**                | 0.74<br>±<br>0.07 <sup>***</sup>  | 0.96<br>±<br>0.07**                | 0.76<br>±<br>0.05 <sup>***</sup>   | 0.60<br>±<br>0.15 <sup>NS</sup>  | 0.73<br>±<br>0.06*          | 0.70<br>±<br>0.08 <sup>NS</sup>    | 0.91<br>±<br>0.09**                | 1.70<br>±<br>0.19 <sup>***</sup>   |

**Table S1: Transepithelial resistance and short-circuit current during basolateral capsaicin exposure.**

TER<sub>ini</sub> and Isc<sub>in</sub> represent the mean TER and Isc values at the beginning of the experiment and TER<sub>30</sub> and Isc<sub>30</sub> after 30 min incubation with vehicle (DMSO, control Ctrl) condition or basolateral capsaicin (Cap). ANOVA analysis showed a difference in the TER<sub>ini</sub> (P < 0.001), Dunnett's post Hoc test

showed a difference between TER<sub>ini</sub> Ctrl vs Cap 2.5 μM (P = 0.019), Ctrl vs Cap 15 μM (P < 0.0001), Ctrl vs Cap 25 μM (P = 0.003) and Ctrl vs Cap 100 μM (P = 0.031). Similarly a difference in Isc<sub>ini</sub> was found by ANOVA (P = 0.03), Dunnett's Post hoc test showed that none were different from control. After 30 min in presence of capsaicin ANOVA analysis found a significant difference (P < 0.0001, one way ANOVA), Dunnett's Post Hoc test showed that Cap 2.5 μM TER<sub>30</sub> (P < 0.0003), Cap 15 μM TER<sub>30</sub> (P < 0.0001), Cap 25 μM TER<sub>30</sub> (P = 0.001), Cap 30 μM TER<sub>30</sub> (P = 0.001), Cap 40 μM TER<sub>30</sub> (P = 0.01) were different from Ctrl. Similarly ANOVA analysis for Isc<sub>30</sub> shows a significant difference (P = 0.002, one way ANOVA), Dunnett's Post Hoc test showed that none of the Isc<sub>30</sub> were different from Ctrl. Stars represent paired t-test comparison of TER<sub>ini</sub> vs TER<sub>30</sub> and Isc<sub>ini</sub> vs Isc<sub>30</sub>. \* P < 0.05, \*\* P < 0.01 and \*\*\* P < 0.001, NS non-significant.

|                                                     | Ctrl<br>(DMSO)                     | Cap<br>1 $\mu$ M                   | Cap<br>2.5 $\mu$ M           | Cap<br>5 $\mu$ M                   | Cap<br>10 $\mu$ M                  | Cap<br>15 $\mu$ M                 | Cap<br>20 $\mu$ M                 | Cap<br>25 $\mu$ M             | Cap<br>30 $\mu$ M                | Cap<br>40 $\mu$ M                 | Cap<br>50 $\mu$ M                | Cap<br>100<br>$\mu$ M            | Cap<br>300<br>$\mu$ M             |
|-----------------------------------------------------|------------------------------------|------------------------------------|------------------------------|------------------------------------|------------------------------------|-----------------------------------|-----------------------------------|-------------------------------|----------------------------------|-----------------------------------|----------------------------------|----------------------------------|-----------------------------------|
| TER <sub>ini</sub><br>( $\Omega$ .cm <sup>2</sup> ) | 1429.9<br>±<br>122.6<br>n = 23     | 1375.9<br>±<br>256.9<br>n = 11     | 1774.5<br>±<br>209<br>n = 12 | 1420.5<br>±<br>304.1<br>n = 11     | 1277.6<br>±<br>218.4<br>n = 13     | 1709.7<br>±<br>201.6<br>n = 12    | 1529.4<br>±<br>201.0<br>n = 14    | 1966.3<br>±<br>196.7<br>n = 8 | 1145.7<br>±<br>117.7<br>n = 10   | 1022.4<br>±<br>57.4<br>n = 9      | 855.5<br>±<br>32.9<br>n = 10     | 1194.9<br>±<br>134.6<br>n = 8    | 1436.7<br>±<br>289.9<br>n = 8     |
| Isc <sub>ini</sub><br>( $\mu$ A/cm <sup>2</sup> )   | 0.75<br>±<br>0.06                  | 0.76<br>±<br>0.05                  | 0.62<br>±<br>0.06            | 0.81<br>±<br>0.06                  | 0.69<br>±<br>0.04                  | 0.59<br>±<br>0.06                 | 0.90<br>±<br>0.12                 | 0.70<br>±<br>0.06             | 0.69<br>±<br>0.04                | 0.71<br>±<br>0.05                 | 0.51<br>±<br>0.07                | 0.46<br>±<br>0.05                | 0.62<br>±<br>0.11                 |
| TER <sub>30</sub><br>( $\Omega$ .cm <sup>2</sup> )  | 1393.8<br>±<br>123.9 <sup>NS</sup> | 1408.3<br>±<br>268.8 <sup>NS</sup> | 1349.7<br>±<br>111.3*        | 1405.8<br>±<br>303.4 <sup>NS</sup> | 1337.2<br>±<br>250.2 <sup>NS</sup> | 1428.2<br>±<br>67.1 <sup>NS</sup> | 1224.9<br>±<br>96.9 <sup>NS</sup> | 1243.0<br>±<br>191.1*         | 993.4<br>±<br>99.3 <sup>NS</sup> | 1053.9<br>±<br>84.0 <sup>NS</sup> | 917.9<br>±<br>49.2 <sup>NS</sup> | 955.6<br>±<br>98.0 <sup>NS</sup> | 898.0<br>±<br>122.4 <sup>NS</sup> |
| Isc <sub>30</sub><br>( $\mu$ A/cm <sup>2</sup> )    | 1.15<br>±<br>0.24 <sup>NS</sup>    | 0.70<br>±<br>0.06*                 | 1.51<br>±<br>0.33**          | 0.76<br>±<br>0.07 <sup>NS</sup>    | 0.74<br>±<br>0.06 <sup>NS</sup>    | 1.37<br>±<br>0.31*                | 2.04<br>±<br>0.43**               | 2.31<br>±<br>0.27***          | 0.95<br>±<br>0.14 <sup>NS</sup>  | 0.72<br>±<br>0.04 <sup>NS</sup>   | 0.49<br>±<br>0.06 <sup>NS</sup>  | 0.83<br>±<br>0.17*               | 1.44<br>±<br>0.40*                |

**Table S2: Transepithelial resistance and short-circuit current during apical capsaicin exposure.**

TER<sub>ini</sub>, Isc<sub>in</sub>, TER<sub>30</sub> and Isc<sub>30</sub> have the same meaning as the one described in Table S1. ANOVA analysis shows a difference in TER<sub>ini</sub> and Isc<sub>ini</sub> (P = 0.02, and P = 0.008, one way ANOVA), but in each case they were not different from Ctrl as tested by Dunnett's post hoc. After 30 min incubation no

difference was found among the baseline values for TER<sub>30</sub> (P = 0.18, one way ANOVA), but difference in Isc<sub>30</sub> (P = < 0.0001, one way ANOVA). Dunnett's Post Hoc test shows that Cap 20 μM and 25 μM were different from Ctrl (P = 0.03 and P = 0.01) respectively. Stars represent paired *t*-test comparison of TER<sub>ini</sub> vs TER<sub>30</sub> and Isc<sub>ini</sub> vs Isc<sub>30</sub>. \* P < 0.05, \*\* P < 0.01 and \*\*\* P < 0.001, NS non-significant.

|                                                     | Ctrl                                   | Cap 5 $\mu$ M                           | AMG-9810<br>1 $\mu$ M                  | AMG-9810<br>10 $\mu$ M                |
|-----------------------------------------------------|----------------------------------------|-----------------------------------------|----------------------------------------|---------------------------------------|
| TER <sub>ini</sub><br>( $\Omega$ .cm <sup>2</sup> ) | 1602.3 $\pm$ 55.5<br>n =12             | 1621.3 $\pm$ 101.6<br>n =12             | 1534.8 $\pm$ 75.6<br>n =12             | 1710.7 $\pm$ 128.5<br>n =12           |
| Isc <sub>ini</sub><br>( $\mu$ A/cm <sup>2</sup> )   | 0.85 $\pm$ 0.03                        | 0.82 $\pm$ 0.03                         | 0.77 $\pm$ 0.05                        | 0.81 $\pm$ 0.04                       |
| TER <sub>30</sub><br>( $\Omega$ .cm <sup>2</sup> )  | 1688.2<br>$\pm$<br>119.5 <sup>NS</sup> | 1885.7<br>$\pm$<br>154.5 <sup>***</sup> | 1874.1<br>$\pm$<br>154.5 <sup>**</sup> | 1887.9<br>$\pm$<br>258.8 <sup>*</sup> |
| Isc <sub>30</sub><br>( $\mu$ A/cm <sup>2</sup> )    | 1.26 $\pm$ 0.05 <sup>***</sup>         | 1.22 $\pm$ 0.05 <sup>***</sup>          | 1.24 $\pm$ 0.04 <sup>***</sup>         | 1.13 $\pm$ 0.4 <sup>***</sup>         |

**Table S3: Transepithelial resistance and short-circuit current during capsaicin and AMG-9810 exposure.**

TER<sub>ini</sub>, Isc<sub>in</sub>, TER<sub>30</sub> and Isc<sub>30</sub> have the same meaning as the one described in **Error! Reference source not found.**. No significant difference among the baseline values in TER<sub>ini</sub> and Isc<sub>ini</sub> was found P = 0.62 and P = 0.59, one way ANOVA respectively. After 30 min incubation in presence of capsaicin or DMSO, no significant difference in the TER<sub>30</sub> values (P = 0.7, one way ANOVA) or Isc<sub>30</sub> values was found (P = 0.2, one way ANOVA). Stars represent paired *t*-test comparison of TER<sub>ini</sub> vs TER<sub>30</sub> and Isc<sub>ini</sub> vs Isc<sub>30</sub>. \* P < 0.05, \*\* P < 0.01 and \*\*\* P < 0.001, NS non-significant.

|                                                     | Ctrl                                   | Cap 20 $\mu$ M                         | CPZ 10 $\mu$ M                        |
|-----------------------------------------------------|----------------------------------------|----------------------------------------|---------------------------------------|
| TER <sub>ini</sub><br>( $\Omega$ .cm <sup>2</sup> ) | 1102.9 $\pm$ 40.9<br>n =19             | 1123.6 $\pm$ 32.6<br>n =16             | 1100.9 $\pm$ 41.39<br>n =19           |
| Isc <sub>ini</sub><br>( $\mu$ A/cm <sup>2</sup> )   | 1.03 $\pm$ 0.22                        | 0.54 $\pm$ 0.02                        | 0.81 $\pm$ 0.13                       |
| TER <sub>30</sub><br>( $\Omega$ .cm <sup>2</sup> )  | 1098.8<br>$\pm$<br>38.12 <sup>NS</sup> | 1042.5<br>$\pm$<br>38.2 <sup>***</sup> | 1102.1<br>$\pm$<br>41.5 <sup>NS</sup> |
| Isc <sub>30</sub><br>( $\mu$ A/cm <sup>2</sup> )    | 1.17 $\pm$ 0.25 <sup>*</sup>           | 0.68 $\pm$ 0.03 <sup>***</sup>         | 0.96 $\pm$ 0.18 <sup>*</sup>          |

**Table S4: Transepithelial resistance and short-circuit current during capsaicin and capsazepine exposure**

TER<sub>ini</sub>, Isc<sub>in</sub>, TER<sub>30</sub> and Isc<sub>30</sub> have the same meaning as the one described in Table S1. No significant difference in TER<sub>ini</sub> and Isc<sub>ini</sub> among the three groups was found P = 0.9 and P = 0.11, one-way ANOVA respectively. After 30 min incubation ANOVA comparison found no difference in the TER<sub>30</sub> (P = 0.5, one way ANOVA) and Isc<sub>30</sub> values (P = 0.22, one way ANOVA). Stars represent paired *t*-test comparison of TER<sub>ini</sub> vs TER<sub>30</sub> and Isc<sub>ini</sub> vs Isc<sub>30</sub>. \* P < 0.05, and \*\*\* P < 0.001, NS non-significant.

|                                                     | Ctrl (DMSO)                            | OLDA 10 $\mu$ M                        | RTX 1 $\mu$ M                          |
|-----------------------------------------------------|----------------------------------------|----------------------------------------|----------------------------------------|
| TER <sub>ini</sub><br>( $\Omega$ .cm <sup>2</sup> ) | 1551.2 $\pm$ 77.6<br>n = 24            | 1533.6 $\pm$ 76.8<br>n = 24            | 1664.4 $\pm$ 69.6<br>n = 24            |
| Isc <sub>ini</sub><br>( $\mu$ A/cm <sup>2</sup> )   | 0.64 $\pm$ 0.02                        | 0.59 $\pm$ 0.02                        | 0.64 $\pm$ 0.03                        |
| TER <sub>30</sub><br>( $\Omega$ .cm <sup>2</sup> )  | 1786.9<br>$\pm$<br>86.5 <sup>***</sup> | 1879.5<br>$\pm$<br>87.4 <sup>***</sup> | 1820.3<br>$\pm$<br>86.6 <sup>***</sup> |
| Isc <sub>30</sub><br>( $\mu$ A/cm <sup>2</sup> )    | 0.73 $\pm$ 0.09 <sup>NS</sup>          | 0.78 $\pm$ 0.03 <sup>***</sup>         | 0.93 $\pm$ 0.4 <sup>***</sup>          |

**Table S5: Transepithelial resistance and short-circuit current during capsaicin, *N*-Oleoyldopamine and resiniferatoxin exposure.**

TER<sub>ini</sub>, Isc<sub>in</sub>, TER<sub>30</sub> and Isc<sub>30</sub> have the same meaning as the ones described in Table S1. **Error! Reference source not found.** No significant difference in the TER<sub>ini</sub> and Isc<sub>ini</sub> values was found among the groups (P = 0.41 and P = 0.37, one way ANOVA). At the end of the incubation period no difference in the TER<sub>30</sub> and Isc<sub>30</sub> was found among the groups (P = 0.74 and P = 0.057, one way ANOVA). Control (Ctrl), *N*-Oleoyldopamine (OLDA), resiniferatoxin (RTX). Stars represent paired *t*-test comparison of TER<sub>ini</sub> vs TER<sub>30</sub> and Isc<sub>ini</sub> vs Isc<sub>30</sub>. \*\*\* P < 0.001, NS non-significant.
